# Supplementary material for: Integrative analysis of RUNX1 downstream pathways and target genes
Source: PubMed Central journal article supplement (PMC2529319; doi:10.1186/1471-2164-9-363), 2008-07-31

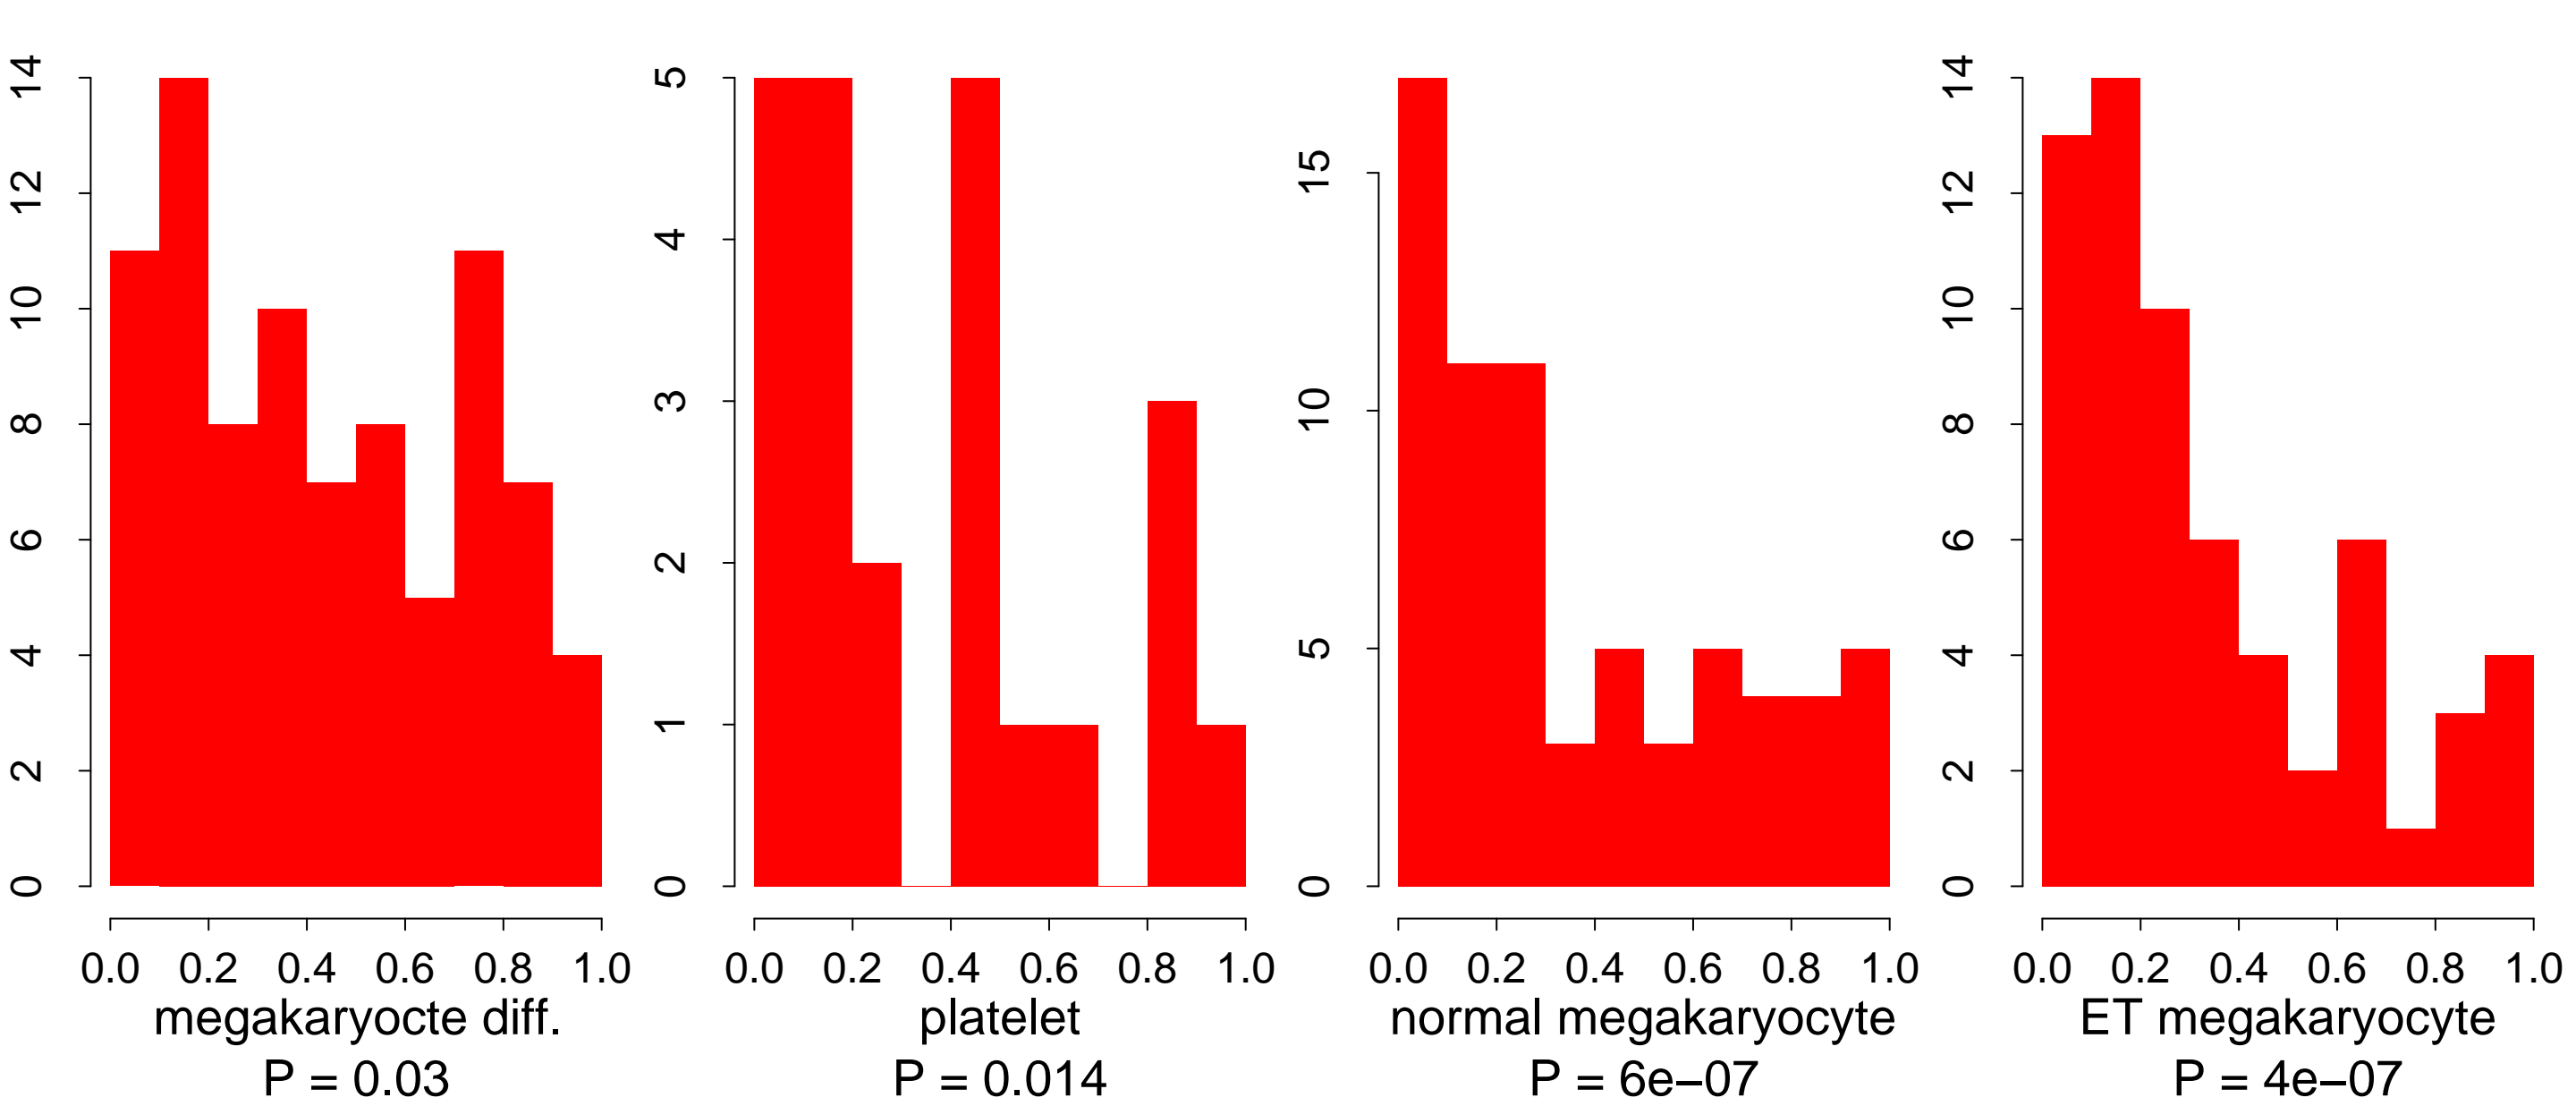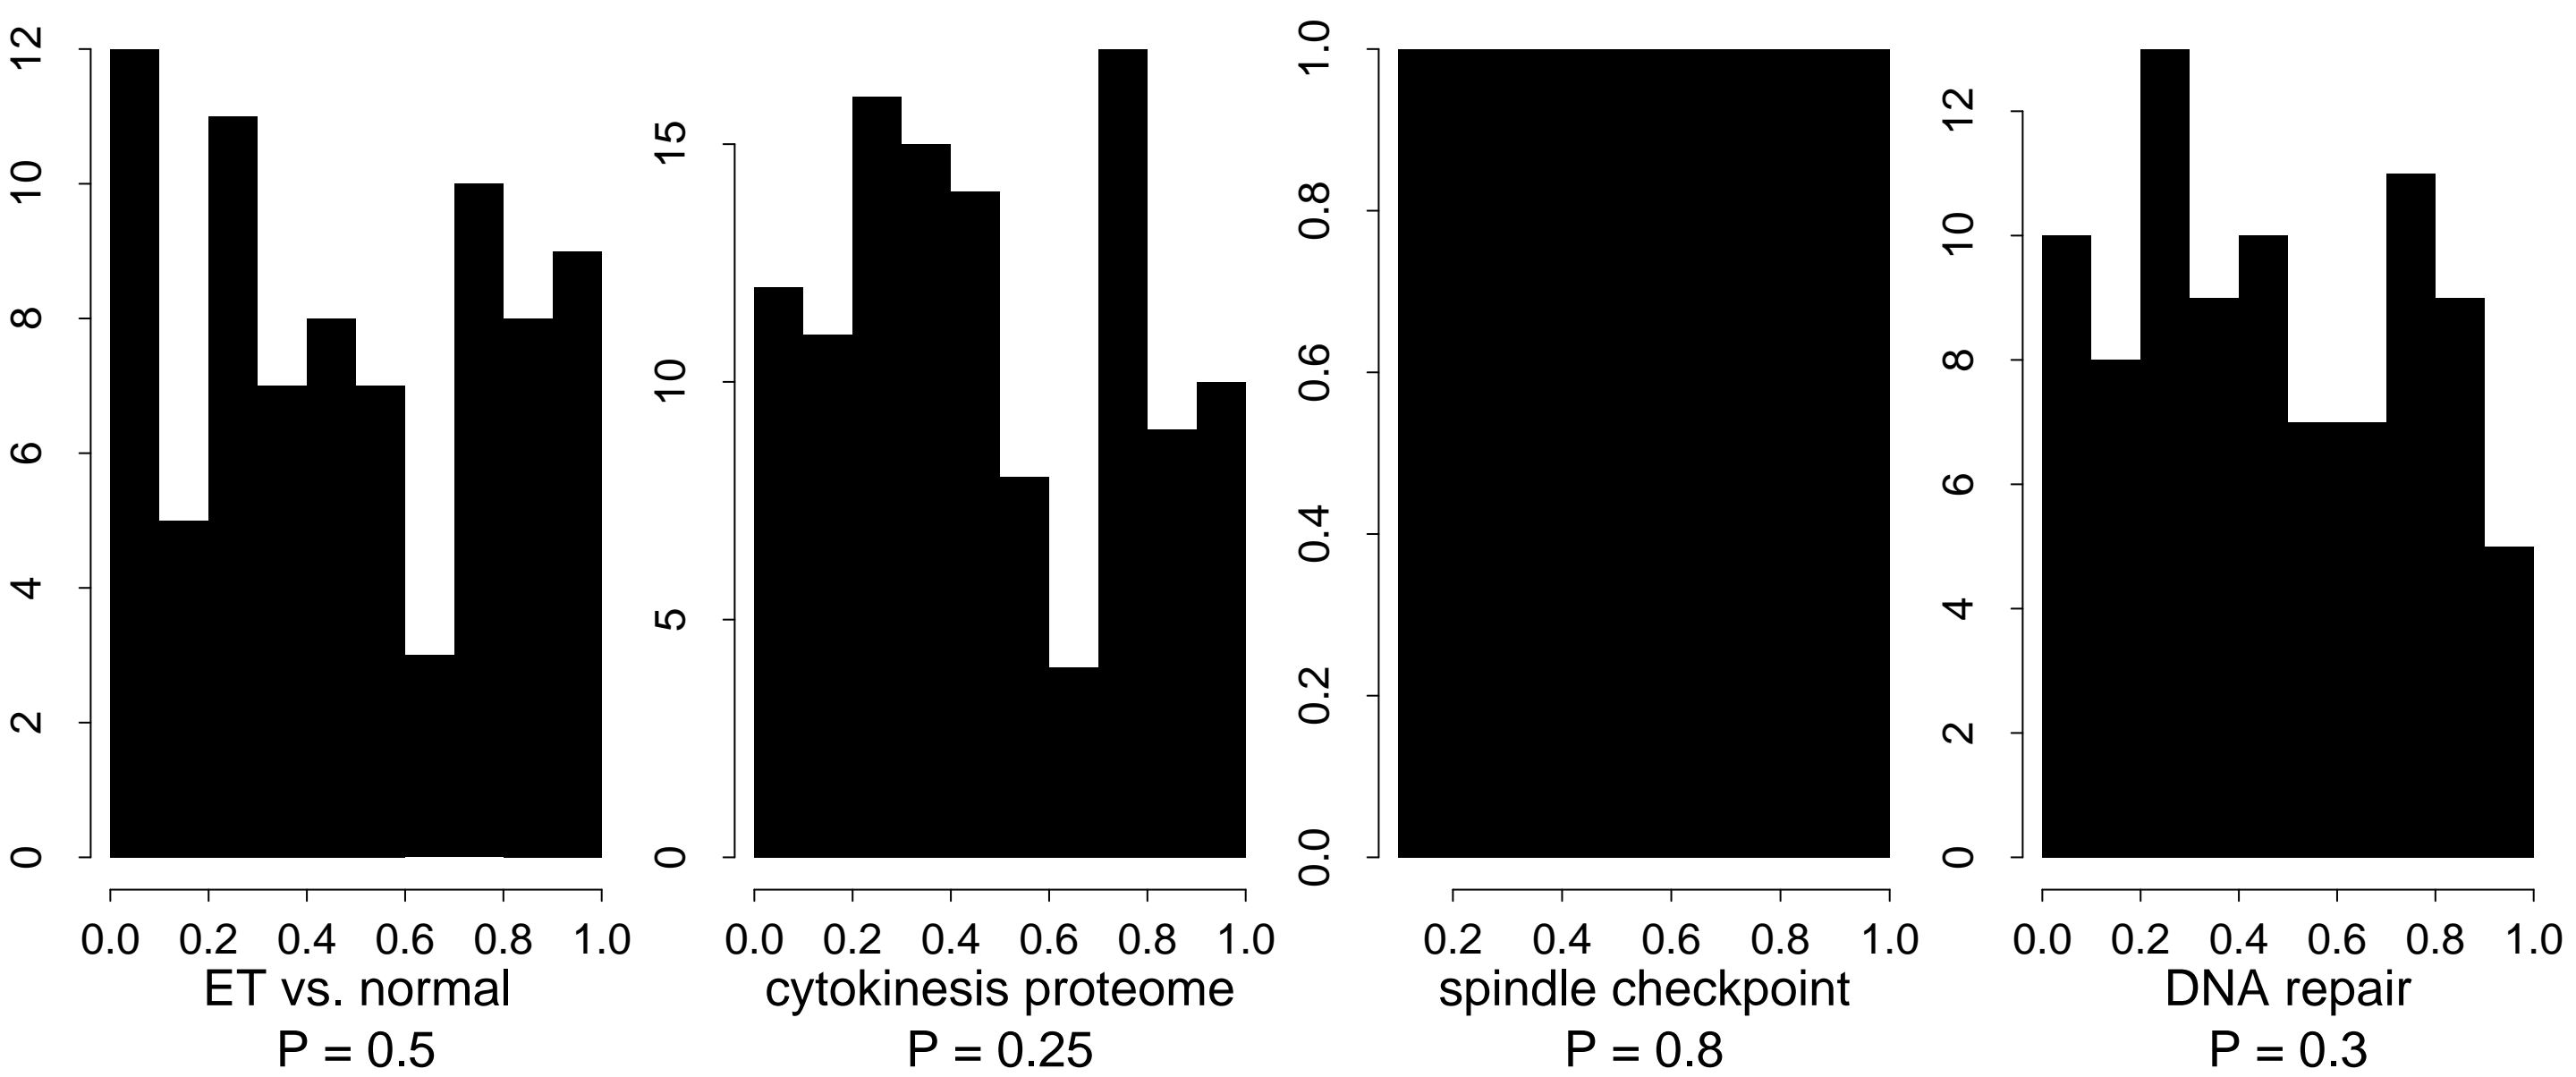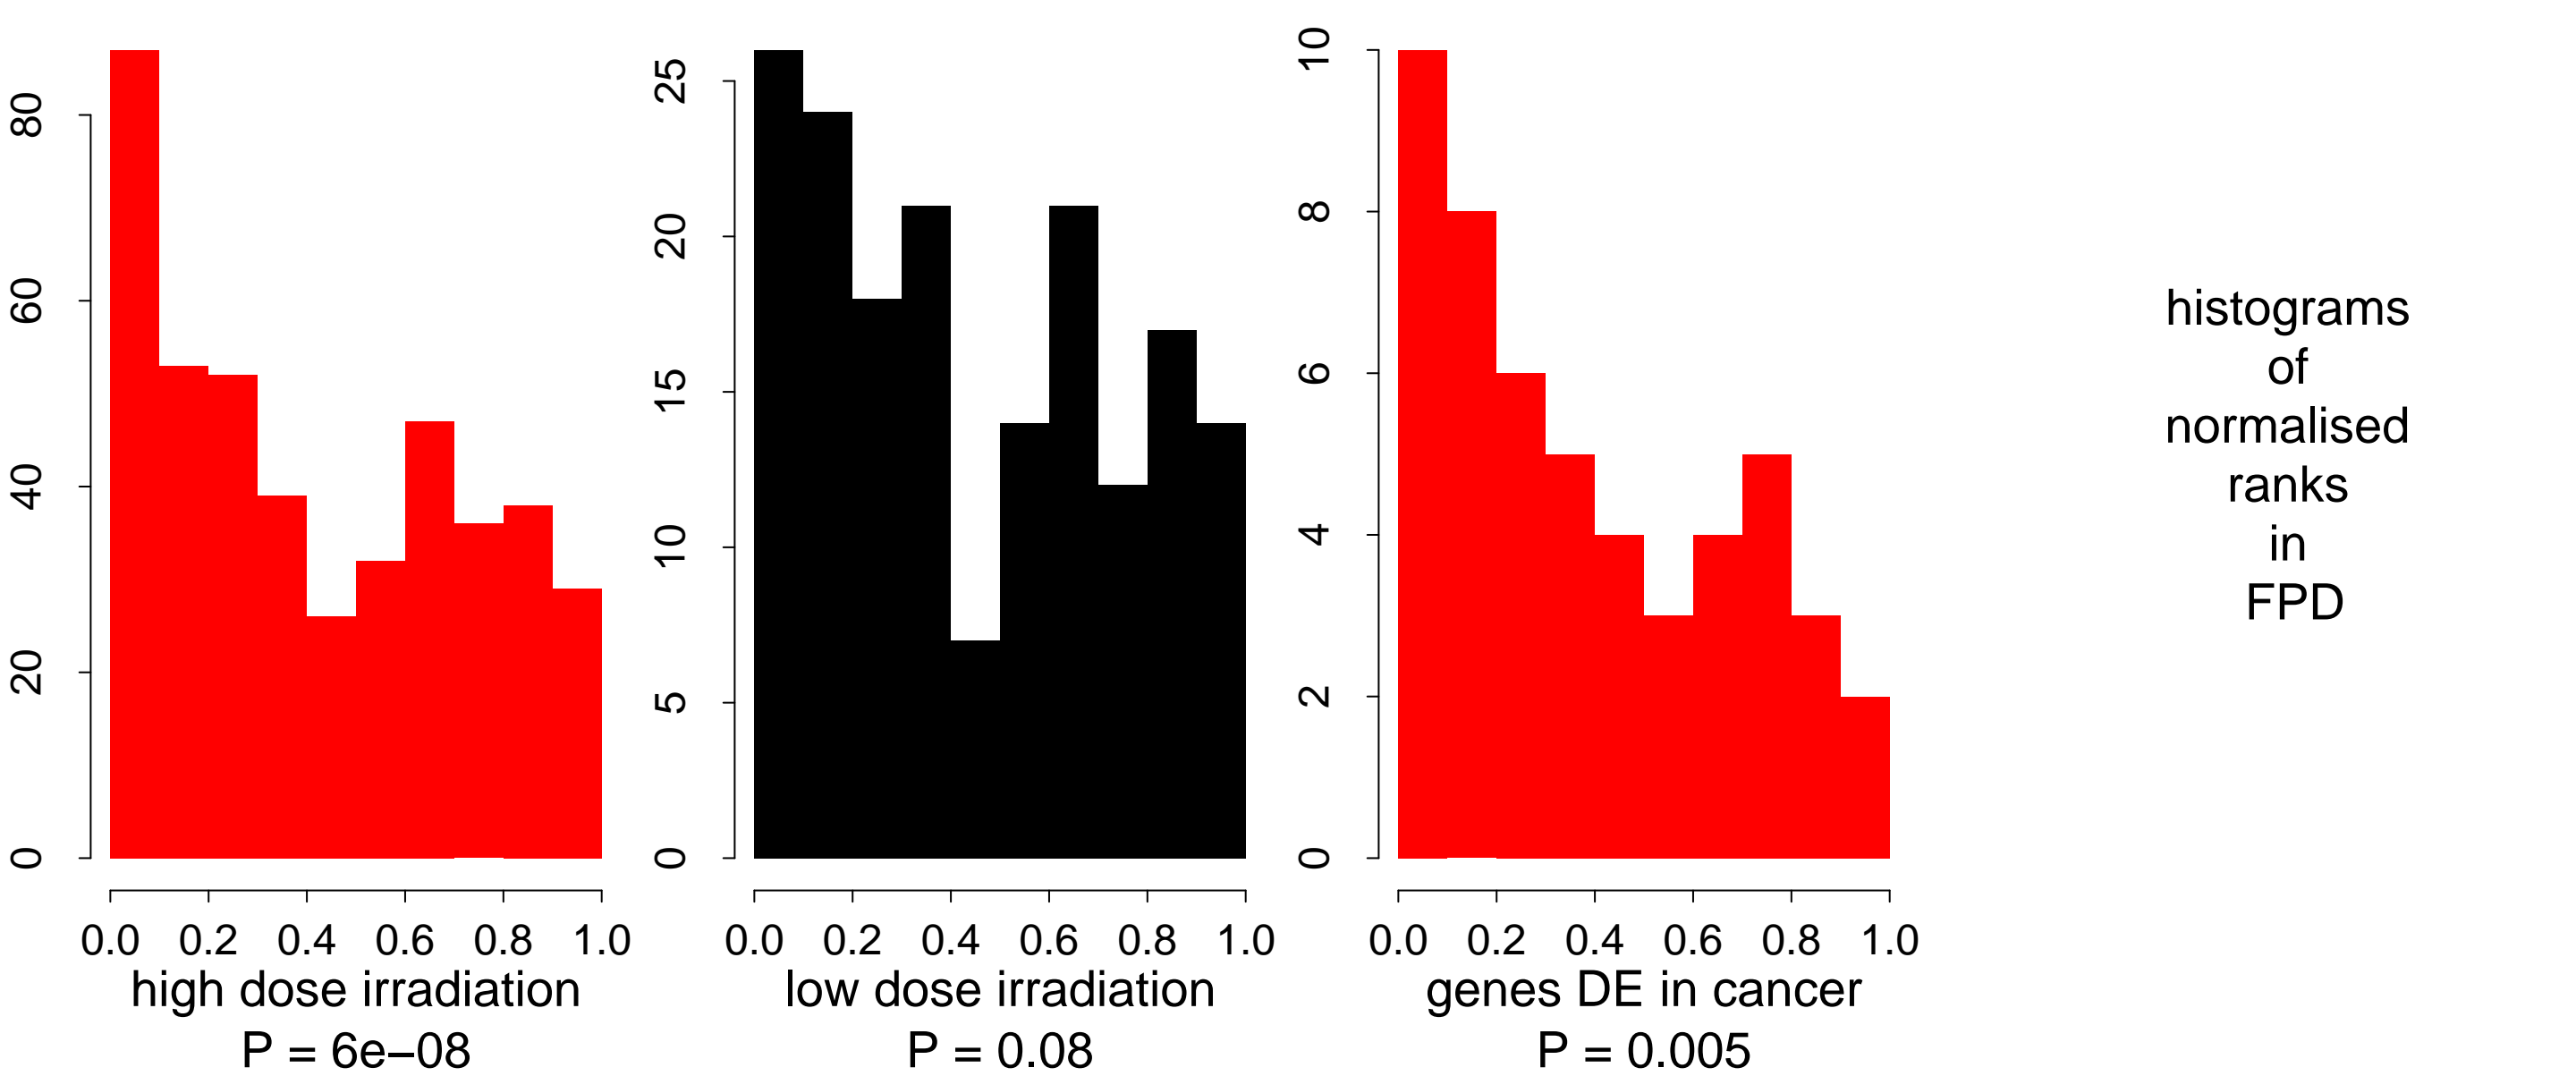

histograms  
of  
normalised  
ranks  
in  
FPD

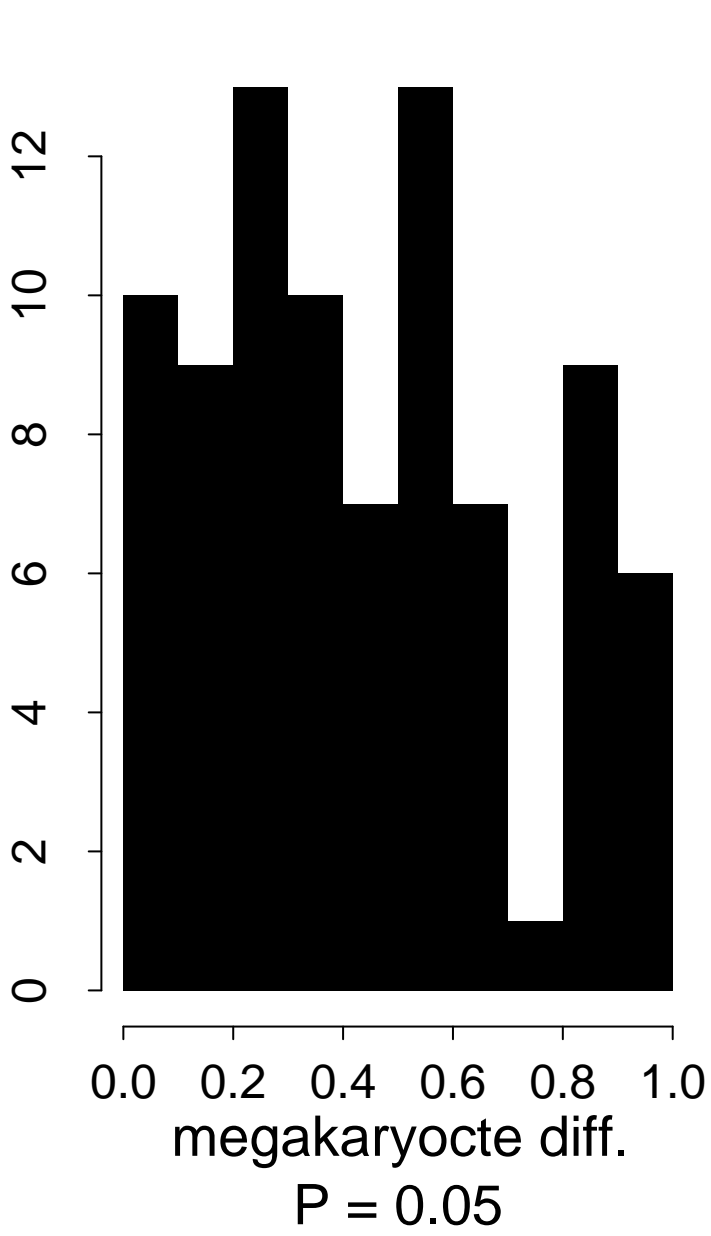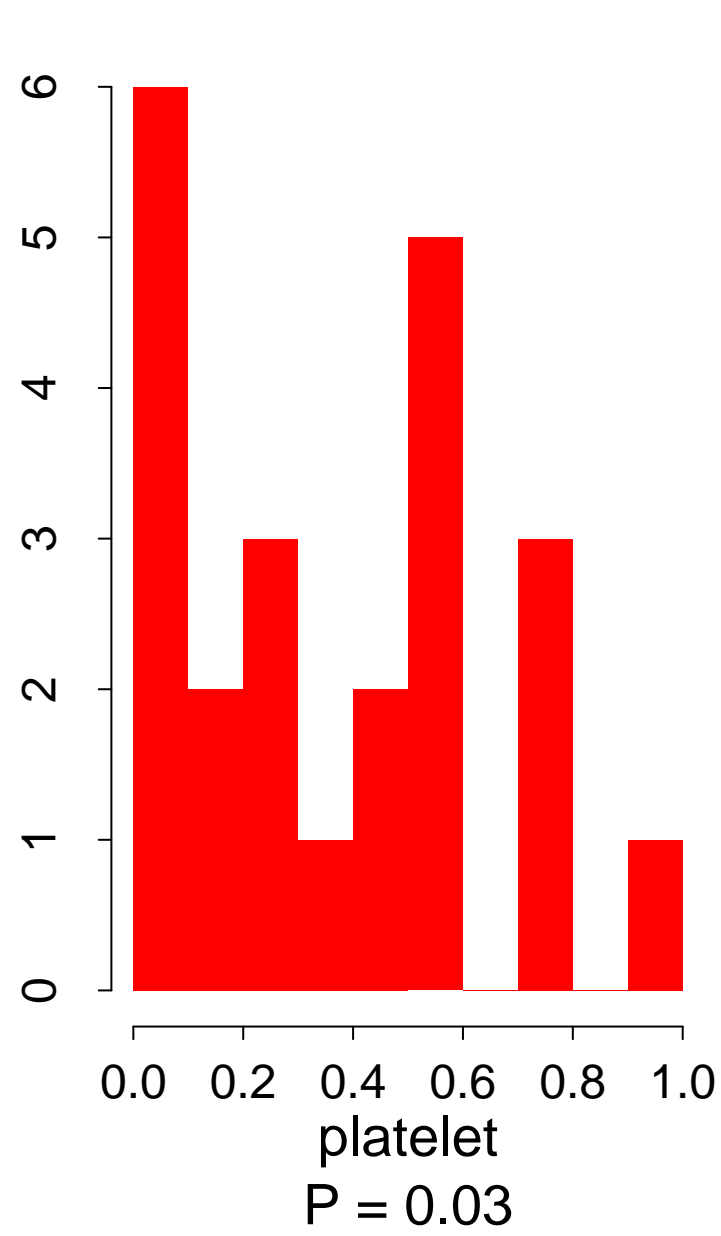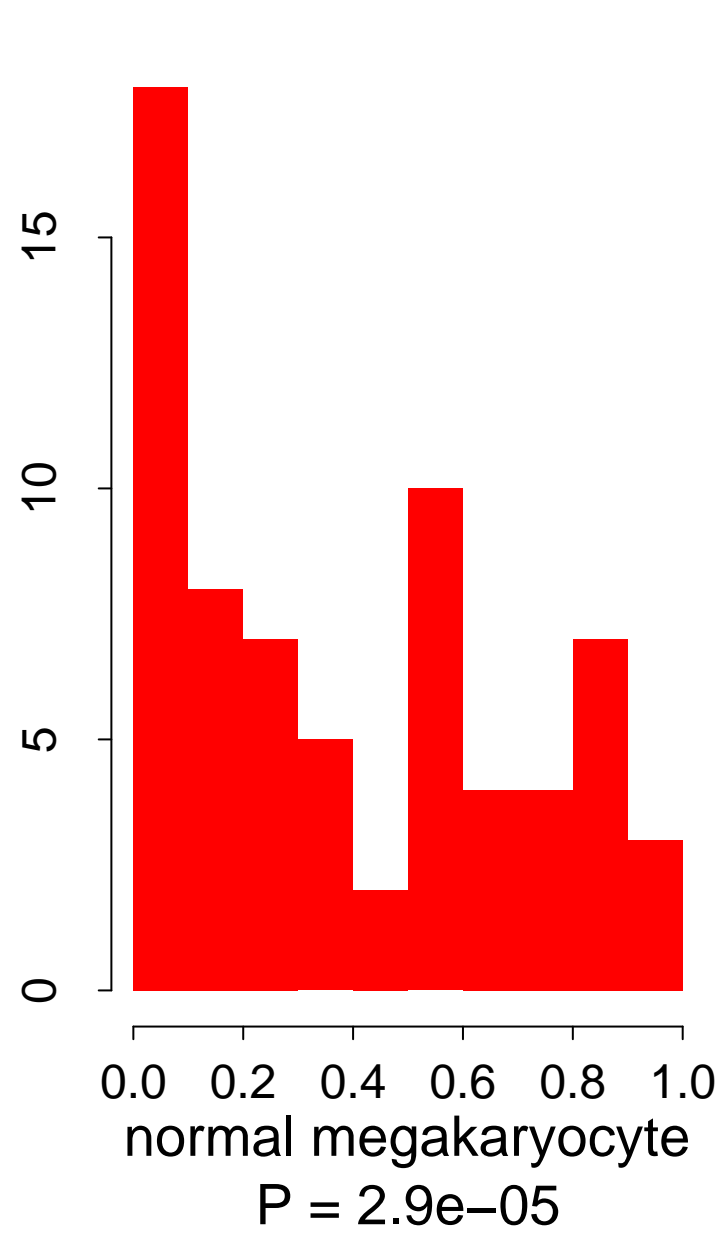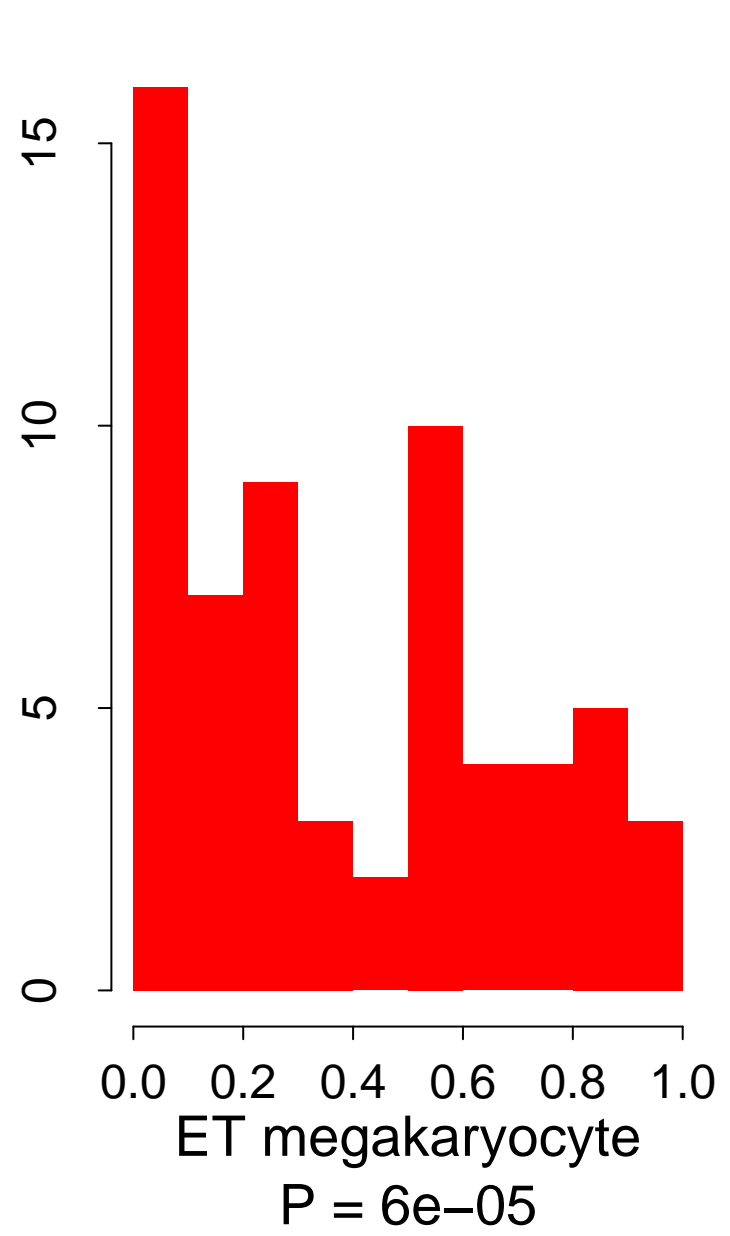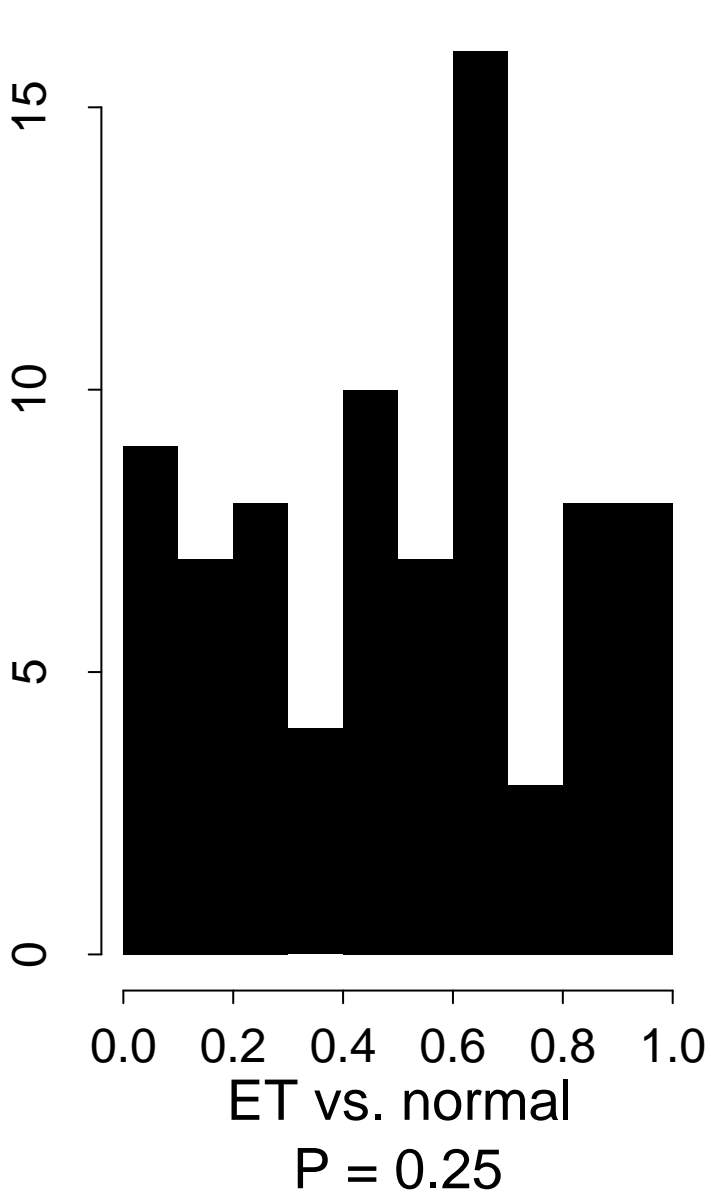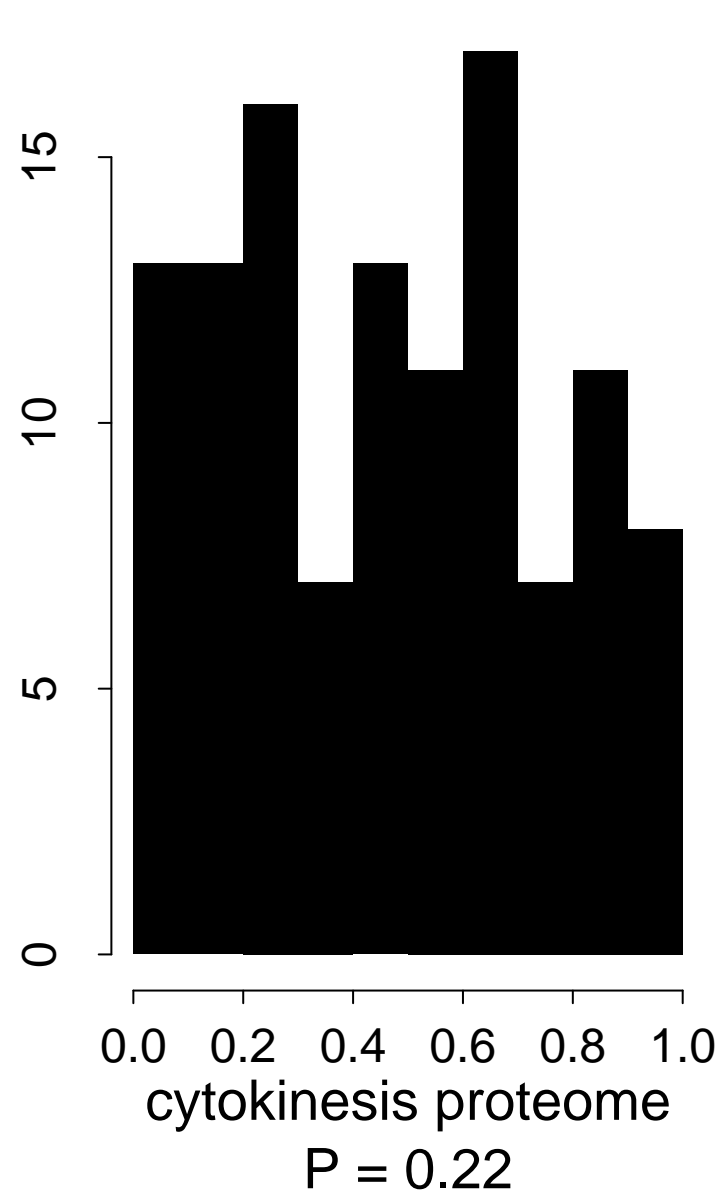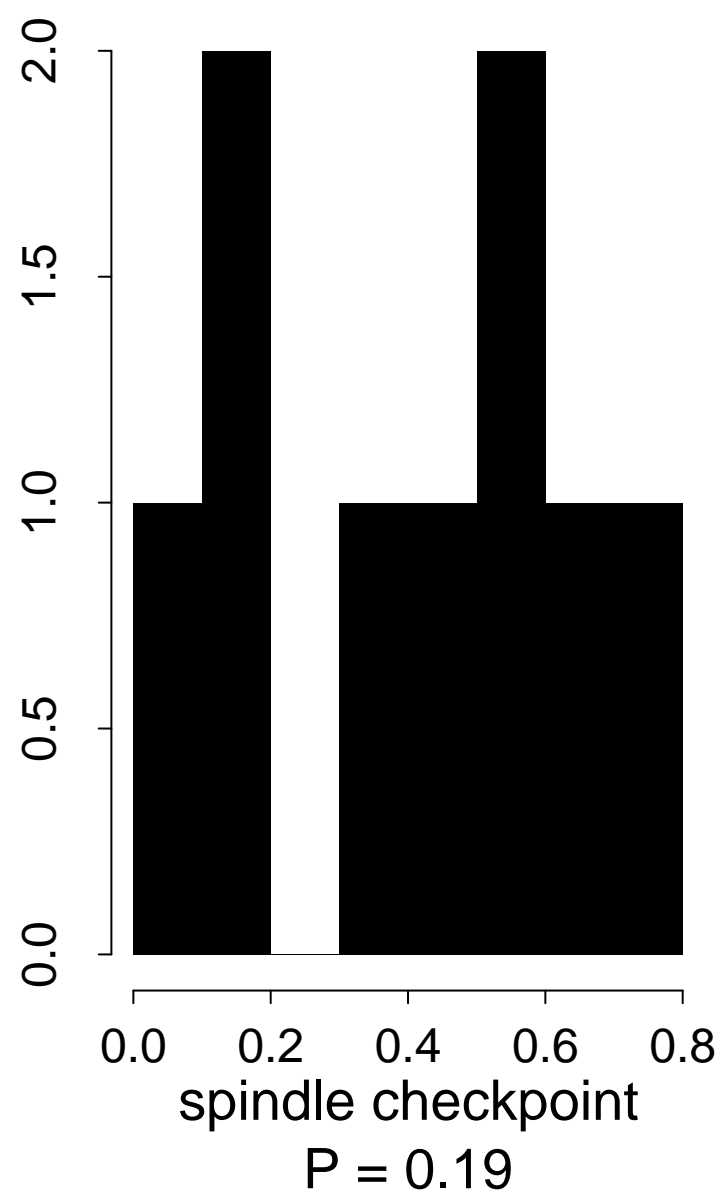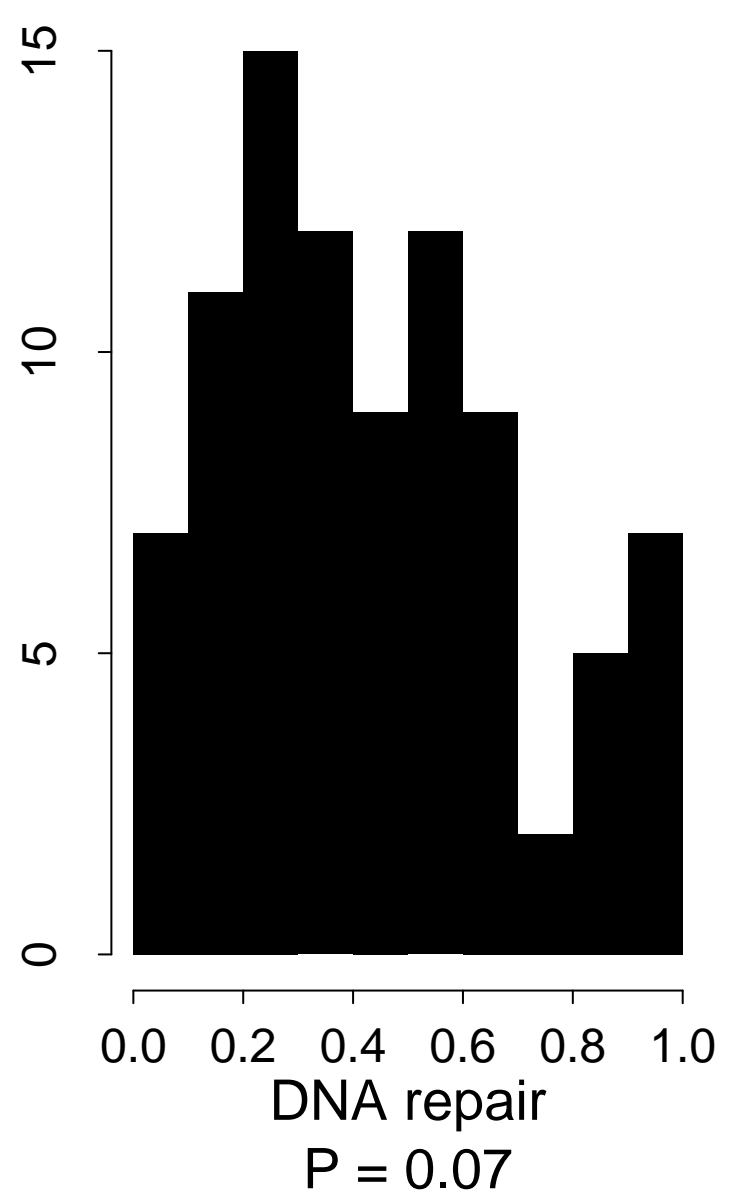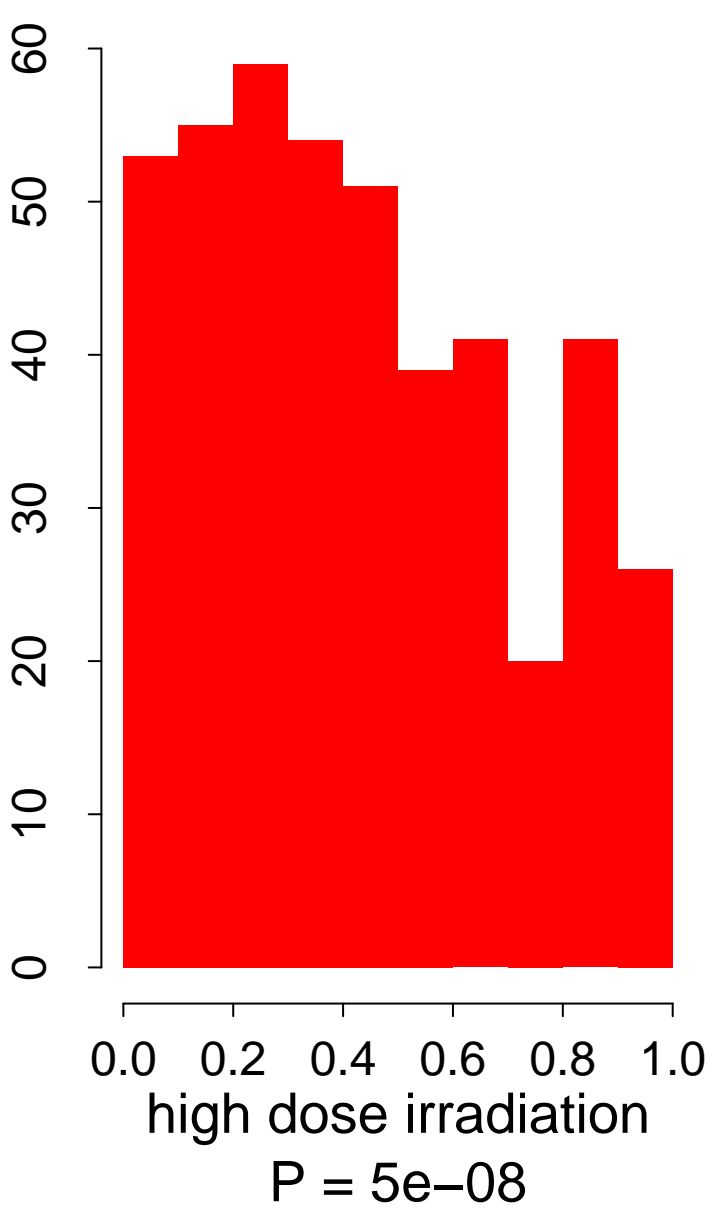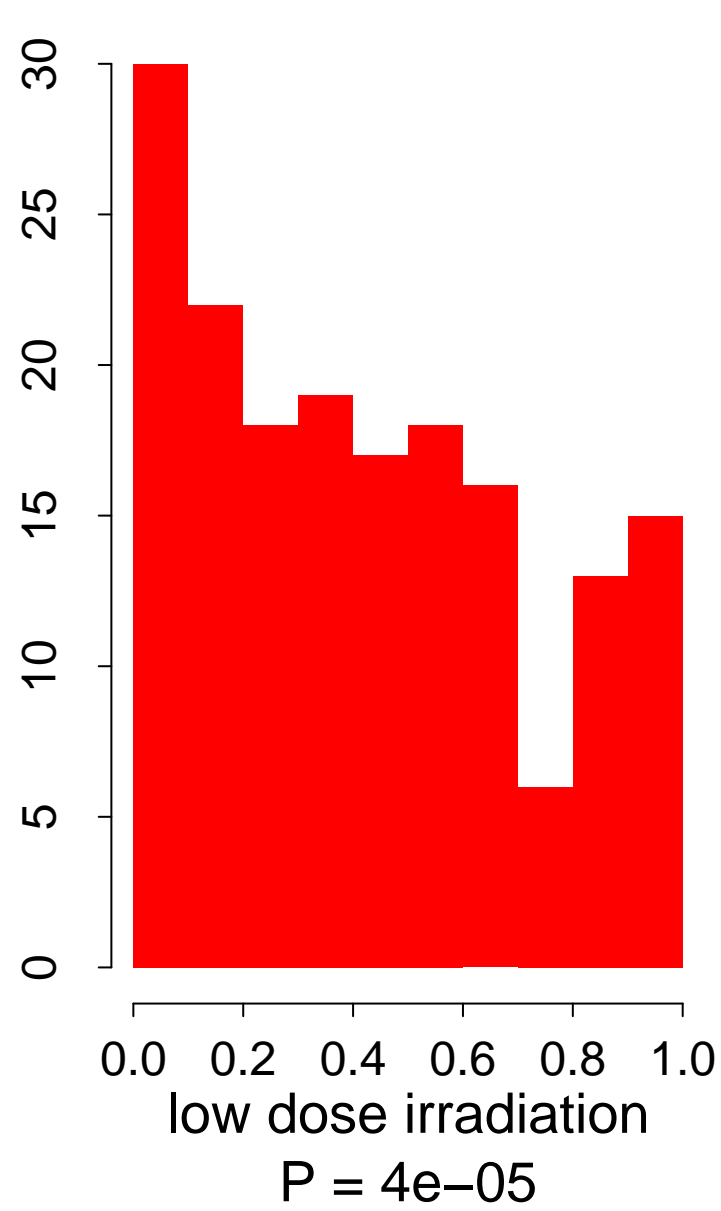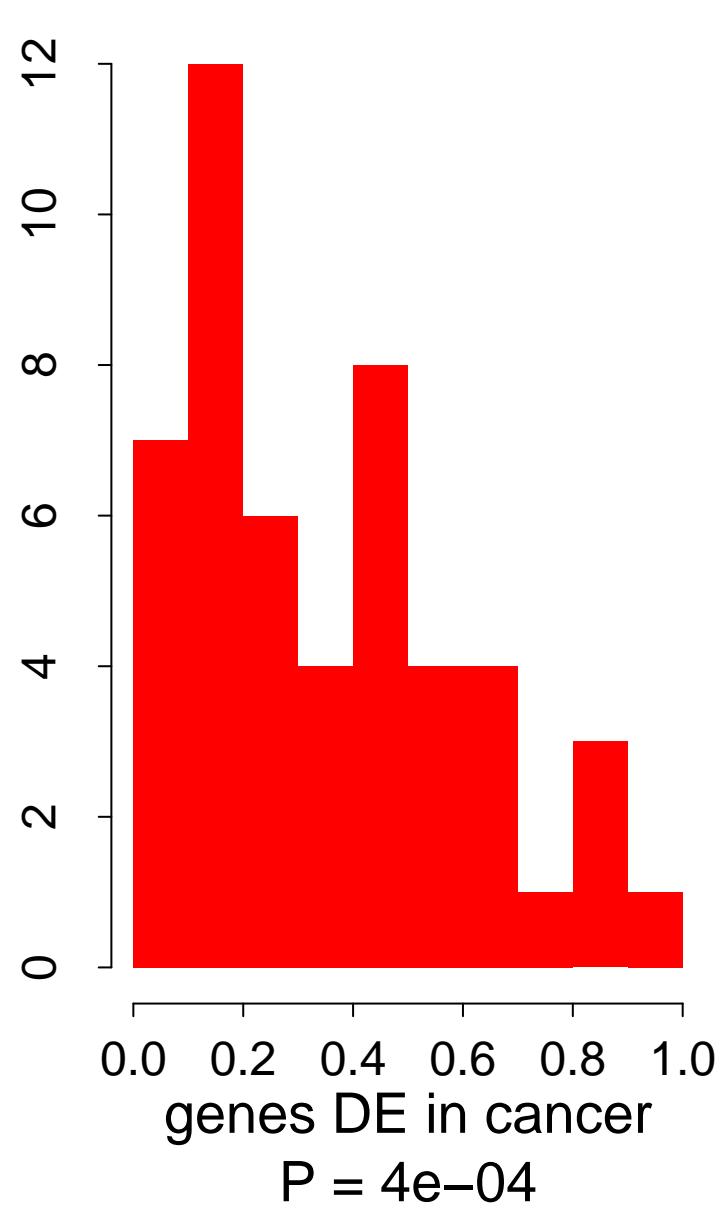

histograms  
of  
normalised  
ranks  
in  
CBF

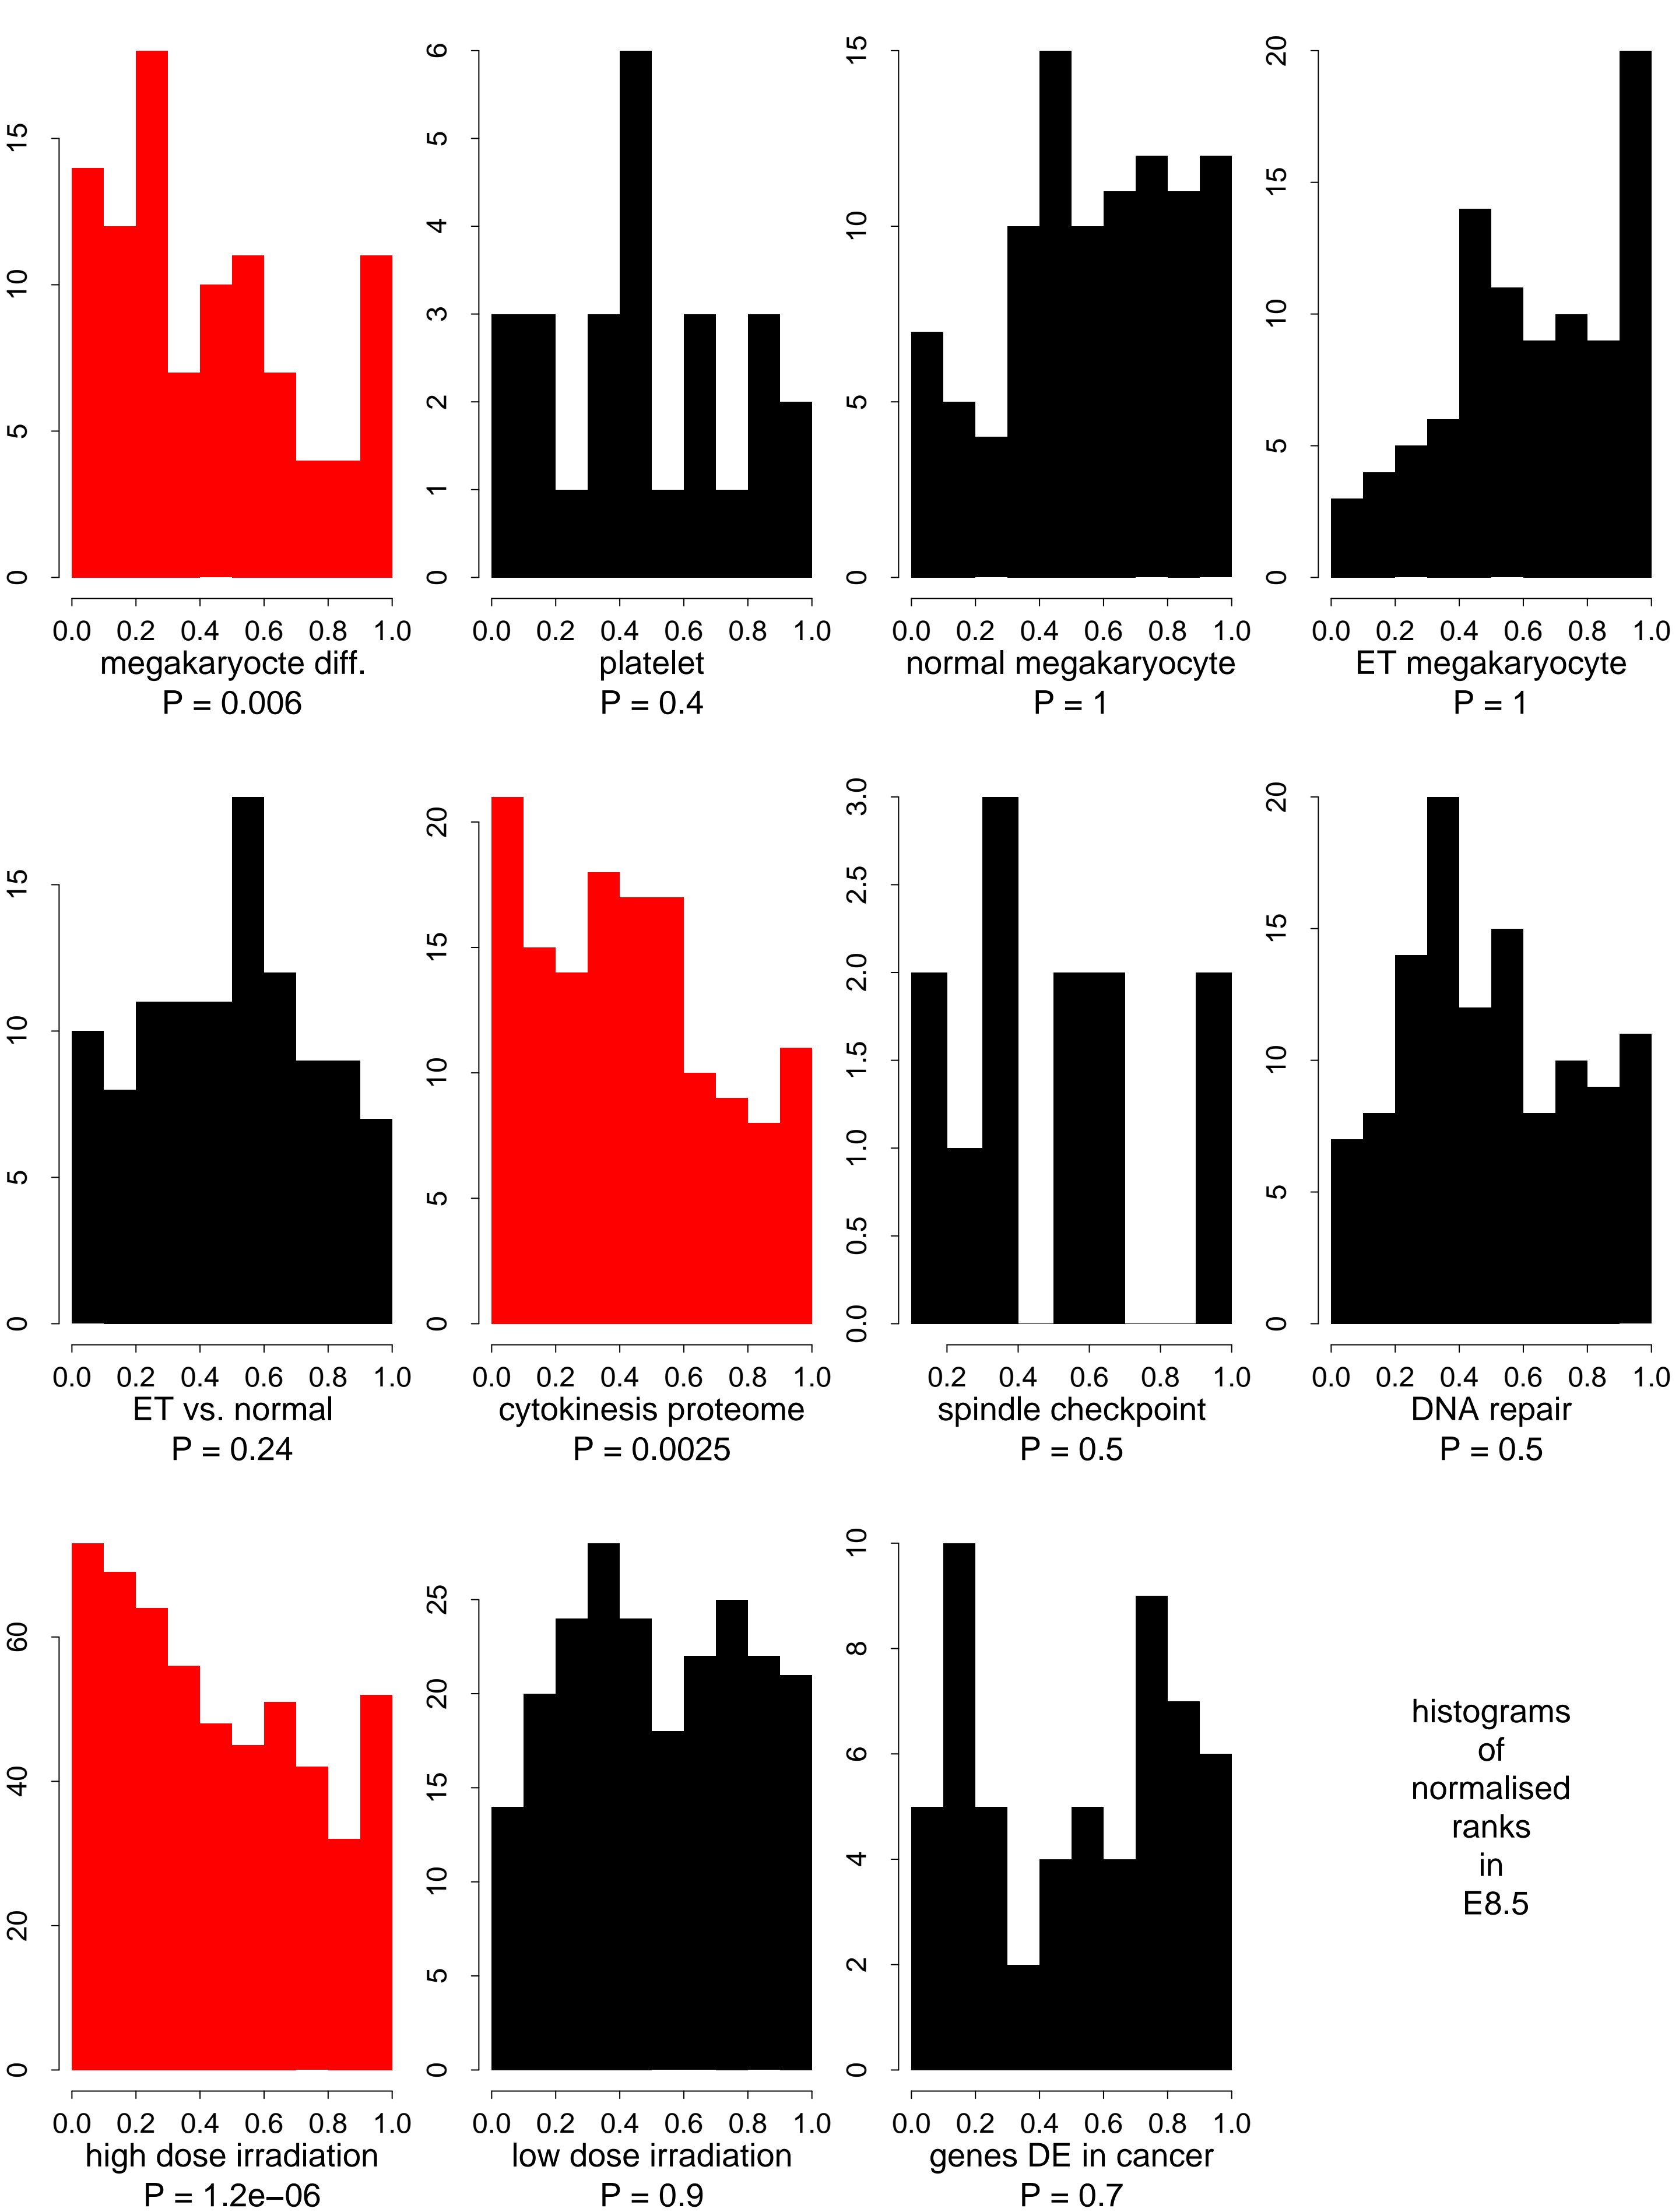

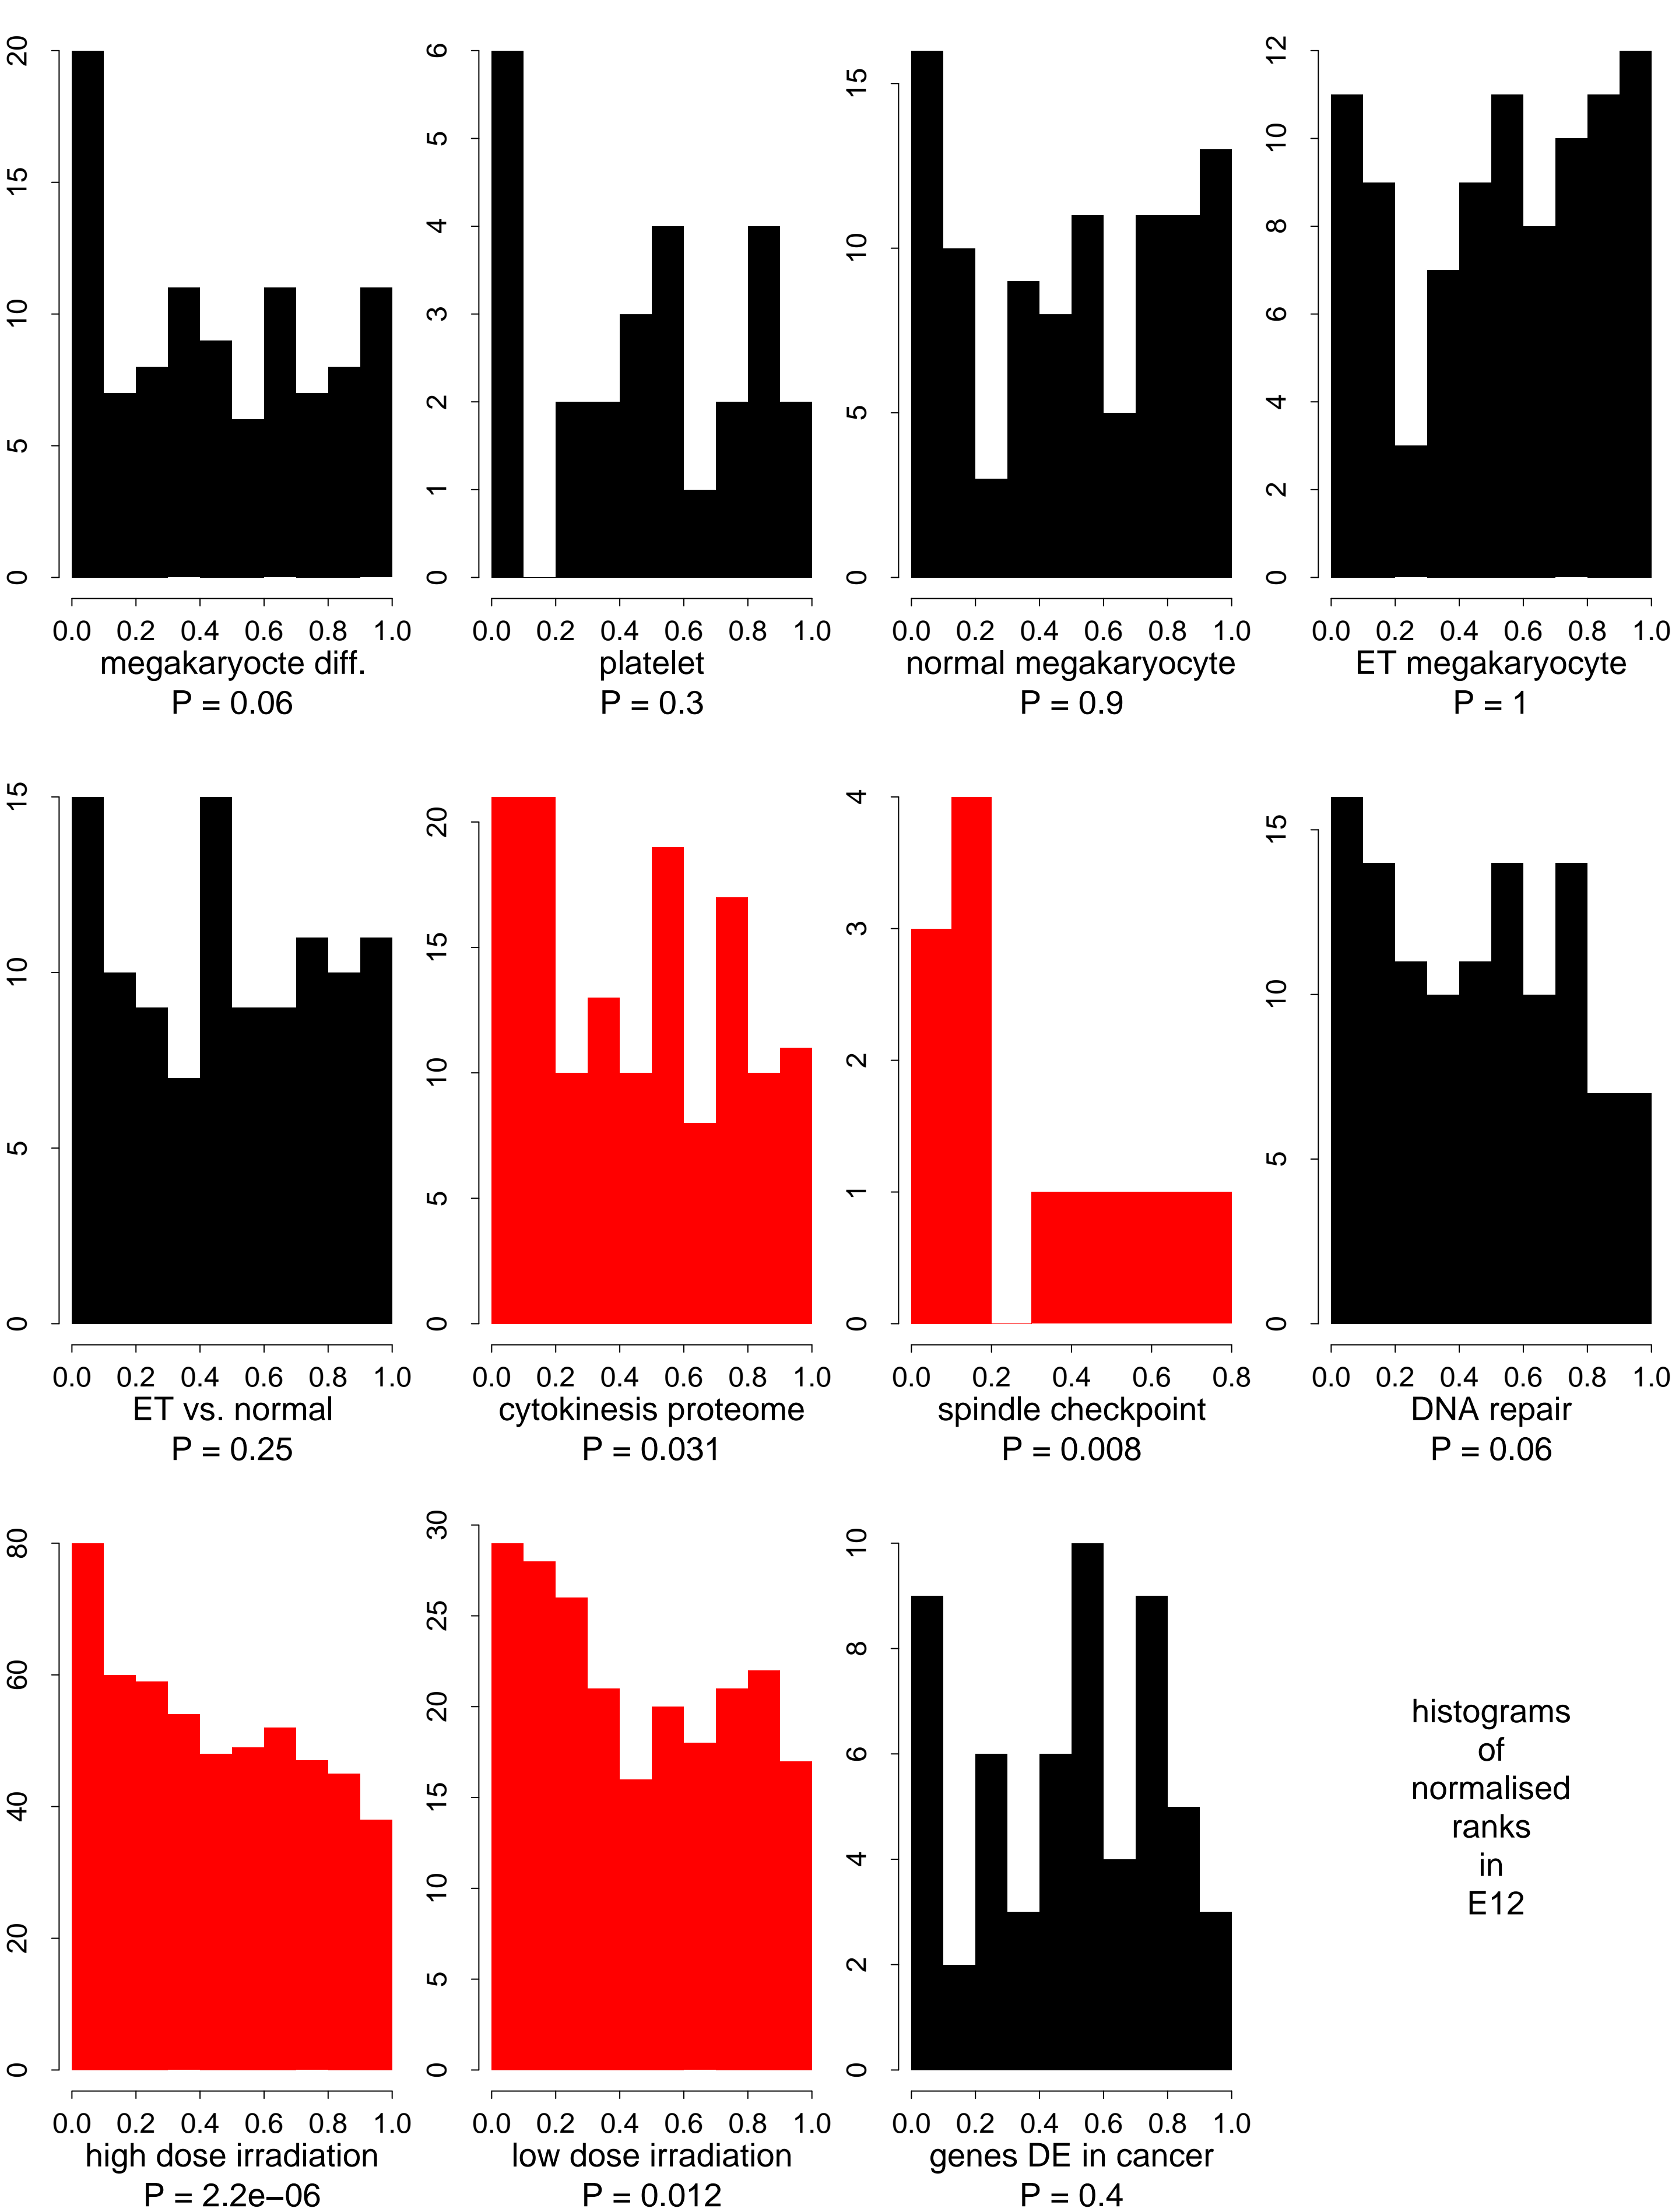

Supplement: 1471-2164-9-363-S4.pdf [file 1471-2164-9-363-S4.pdf]
